1 ***In vitro* induced floral reversion in switchgrass (*Panicum Virgatum* L.)**

2  
3 Yongfeng Wang#, Kunliang Xie#, Fengli Sun, Chao Zhang, Shudong Liu, Yajun Xi\*

4  
5 **Affiliation:**

6 Y. Wang, K. Xie, F. Sun, C. Zhang, S. Liu, Y. Xi

7 1 College of Agronomy, Northwest A&F University, Yangling, Shaanxi 712100, China;

8 2 State Key Laboratory of Crop Stress Biology for Arid Areas, Yangling, Shaanxi 712100, China;

9 # These authors contributed to the work equally and should be regarded as co-first authors.

10  
11 **Corresponding author:**

12 Yajun Xi, Email address: [xiyajun2002@126.com](mailto:xiyajun2002@126.com)

13  
14 **Running head:**

15 *In vitro* induced floral reversion in switchgrass

16  
17 **Abstract:**

18 Switchgrass (*Panicum Virgatum* L.) is a warm-season perennial grass native to North America, it was  
19 used as forage and vegetative filter strips in early days, and have developed into a bioenergy crop in  
20 recent years. In this study, we found that the switchgrass cultivar ‘Alamo’ at elongation stage 4 have  
21 developed inflorescences about 1 cm in length, and *in vitro* incubation of the shoot apexes harboring  
22 inflorescences on Murashige and Skoog’s basal medium supplemented with 3 mg/L  
23 6-benzylaminopurine generated multiple shoot clumps. Anatomical study showed that some of the  
24 regenerated shoots originated from axillary buds on the explants, some of them originated from  
25 adventurous buds and some of them originated from young florets. Further study of shoots originated  
26 from young florets found that the floral organs degenerated or developed into leaf-like organs, and the  
27 flower terminal transformed into a vegetative shoot apical meristem, that’s to say these shoots arise  
28 from flower reversion. *In vitro* induction of floral reversion provided a novel protocol to manipulate  
29 flower development in switchgrass, which might contribute a fundamental for flower development  
30 study in switchgrass and other plants.

31 **Keywords:** floral reversion; cytokinin; microstructure; switchgrass; tissue culture

32

## 33 **1 Introduction**

34 Flowering is an important process in plant life, through which hereditary material was transferred to  
35 offspring over sexual reproduction (Scutt & Vandenbussche, 2014). In general, plant species old  
36 enough carry out an irreversible one-way progression: blossom, pollinate, fertilize, and produce seeds  
37 (Irish 2010). However, some florally evoked plants may also reverse developed into an earlier phase or  
38 the vegetative phase if the photoperiod (Zhao et al., 2002; McCullough et al., 2010; Washburn &  
39 Thomas, 2000) or temperature (Day et al., 1994; Moncur, 1992) changed to a certain condition that was  
40 unfavorable for flowering, and it was termed flower reversion. Flower reversion has been described in  
41 many plants including both monocots and dicots (Battey & Lyndon, 1990; Tooke et al., 2005).  
42 According to the difference in reversion pattern, flower reversion was classified as flower reversion,  
43 inflorescence reversion and partial flowering (Battey & Lyndon, 1990).

44 Many factors have been reported influencing flower reversion, they were summarized in reviews of  
45 Battey and Lyndon (1990) and Tooke et al. (2005), and more recent reports are presented in this article  
46 as an up-date in table 1. Among factors influencing flower reversion, photoperiod and temperature  
47 were best described. For example, *Impatiens balsamina* is a short-day plant, transferring plants to  
48 continuous long-day after a treatment of 5 short days finally raise up to flower reversion (Tooke et al.,  
49 2005), *Arabis alpine* is a plant that requires 18-24 weeks of low temperature to be able to flower  
50 normally, with insufficient low temperature treatment, the florets on the inflorescence branches will  
51 convert to vegetative growth (Lazaro et al., 2018). Besides, the air humidity was also considered a  
52 factor influencing flower reversion. In *Whytockia bijieensis*, low temperature and low humidity in the  
53 night is the inductive condition of flower reversion, if the humidity is higher than 75%, the plant will  
54 not reverse developed (Wang, 2001). Plant hormones is another factor affecting flower development. In  
55 *I. balsamina*, insufficient short day treatment lead to flower reversion, however, exogenous application  
56 of gibberellin will suppress the transition (Nanda et al., 1967).

57 Switchgrass is a warm-season perennial C4 plant native to North America, it was traditionally used  
58 in animal feed and soil erosion prevention (Parrish et al., 2012; Parrish & Fike, 2005). Due to the  
59 advantage of broad adaptation, drought tolerance, and high production of biomass, it was selected as a  
60 potential bioenergy crop by the United States Department of Energy in the 1980s (Keshwani & Cheng,  
61 2009; Parrish et al., 2012; Parrish & Fike, 2005; Sanderson et al., 2006). In this study, *in vitro*  
62 incubation of switchgrass immature inflorescence produced flower reversion, and it was further  
63 confirmed by anatomy and histology study. Flower reversion induction provided a novel protocol to  
64 manipulate flower development in switchgrass, it will benefit us in switchgrass flower development  
65 and flower meristem maintain study.

## 67 **2 Materials and Methods**

### 68 **2.1 Switchgrass floral reversion induction**

69 The switchgrass cultivar 'Alamo' that grew under field conditions in Yangling, Shaanxi, China, was  
70 used as plant material. Shoot apexes of tillers at E3 to E4 stage (Moore et al., 1991; Xi et al., 2009)  
71 were harvested as explants. They were surface sterilized with 70% ethanol (Ante, Anhui, China) for 1  
72 min and then with 8% sodium hypochlorite (Guanghua, Guangdong, China, active chlorine  $\geq 5.5\%$ ) for  
73 3 min (Burriss et al., 2009; Chai et al., 2012). After three times rinse with sterilized reverse osmosis  
74 water, the two ends of each explant were removed 0.5 cm in length. The sterilized explants were  
75 subsequently split longitudinally, each part was placed on shoot induction medium (Chai et al., 2012).

76 The incubation was conducted under photoperiod of 20 h light 4 h dark and constant temperature of

77 25 °C. Four weeks later, the explants were transferred on fresh shoot induction medium for another 30  
78 d of subculture (Chai et al., 2012).

79 Shoot induction medium: MS basal medium (Murashige & Skoog 1962), supplemented with 3  
80 mg·L<sup>-1</sup> BAP (Sanland, Fujian, China), 7.5 g·L<sup>-1</sup> agar, and 30 g·L<sup>-1</sup> sucrose (Chai et al., 2012).

## 81 **2.2 Anatomical study of shoots**

82 Shoots emerged from explants were separate from shoot clumps, and then they were distinguished  
83 by the origin and morphology characters. Different kinds of shoots were observed and compared under  
84 a stereoscopic microscope (Nikon SMZ1500, Japan). After that, shoots were split longitudinally with a  
85 scalpel, and the radial section was examined under a stereoscopic microscope as well.

## 86 **2.3 Histological study of shoots**

87 Shoots distinguished by morphology characters were fixed with formalin, acetic acid, and alcohol  
88 (FAA, formalin:acetic acid:70% alcohol = 5:5:90) stationary liquid for 6 hours, then they were stained  
89 with Ehrlich's hematoxylin (Avwioro, 2011) (Maikun, Shanghai, China) for 3 days and immersed in tap  
90 water for 1 hour for differentiation. Stained materials were further dehydrated with a gradient alcohol  
91 series (20 min each of 70%, 80%, and 90%, followed by 15 min of 100% for twice), cleared with  
92 xylene, and infiltrated with melted paraffin wax (Yang, 1986). Then, they were embedded in a paraffin  
93 block and cut into 10 µm slices using a paraffin microtome (JinHuaHuiYou HY-202A, China). Slices  
94 were dewaxed with xylene, post-mounted with Permount Mounting Medium (HuShi, Shanghai, China),  
95 and analyzed under an optical microscope (Chongqing UOP, UB203i, China).

## 96 **2.4 The analysis of factors influencing switchgrass flower reversion**

97 The operations of explants harvesting and sterilization were conducted as described above. The BAP  
98 concentration in shoot induction medium was altered to 0, 1, 2, 3, 4 and 5 mg·L<sup>-1</sup> in the study of BAP  
99 influencing switchgrass flower reversion. The day length was altered to 10, 12, 14, 16, 18 and 20 hours  
100 in the study of photoperiod influencing switchgrass flower reversion. In the study of *in vitro* culture  
101 influencing switchgrass flower reversion, the plants was grown in field conditions. Tillers at E3 to E4  
102 stage were selected and sprayed with 0, 1, 3, 10, 20 and 50 mg·L<sup>-1</sup> BAP, the heading date and the  
103 morphology of flowers were observed. Ten replicates were used for analyses described above.

104

## 105 **3 Results**

### 106 **3.1 Shoot clumps induced from switchgrass immature inflorescence**

107 At the experimental site (Shaanxi province, China), the switchgrass cultivar 'Alamo' sprouting in  
108 late April and heading in middle August. In July, the tillers developed into E3 to E4 stage with 3 or 4  
109 nodes visible (Fig. 1a). Anatomical analysis revealed that an immature inflorescence about 1 cm in  
110 length had developed at the shoot apex (Fig. 1b). Histological study showed that these immature  
111 inflorescences had developed floret meristems, while the pistil and stamens were still missing (Fig. 1b  
112 and 1c). According to the development process of rice inflorescence, it was at the IN6 to IN 7 stage  
113 (Ikeda et al. 2004).

114 After 30 days of incubation on shoot induction medium, explants developed into shoot clumps. The  
115 number of the shoots reach to 20 or more (Fig. 1d). As can be seen from figure 1d, shoots regenerated  
116 from different parts of explants were different in number and thickness. Shoots emerged from the base  
117 of the explants were stouter, while those emerged from apical side of the explants were thinner.  
118 However, shoots emerged from apical side were more dominant in quantity.

119 After another 30 days of subculture, the number of shoots emerged from an explant increased to 50  
120 or more. And shoots emerged from different parts of the explants tend to be uniform in size (Fig. 1e).

### 121 **3.2 Morphology analysis revealed three kinds of shoots with different origin**

122 To investigate the origin of shoots arise from different parts of the explants, we detached the shoot  
123 clumps and compared the morphology characters of different kinds of shoots under a stereoscopic  
124 microscope, and a total of three kinds of shoots were found.

125 The first kind of shoots were speculated originated from the axillary buds, the evidence include: (1)  
126 This kind of shoots emerged from the base of the explants, where possessing two or three nodes with  
127 shortened internodes as described in other forage grasses (Fig.1b, Moore et al. 1991), and on the  
128 explants, axillary buds were also observed(Fig. 2a). (2) These shoots have a distinctive main stem and  
129 it was bigger in size compared with other shoots (Fig. 1d, Fig. 2b, c), which indicated that the main  
130 stem formed first while the other shoots formed relatively later. (3) These shoots were connected with  
131 the main stem directly and arranged symmetrically, which indicated that these shoots formed orderly  
132 along with the development of the main stem, which is similarly to the formation of axillary buds on  
133 the switchgrass tiller. To simplify these shoots were named as “AX shoots” in the following  
134 description.

135 Another kind of shoots were speculated arise from adventitious buds, the evidence include: (1)  
136 Explants used in this experiment were shoot apexes harvested at the E3-E4 stage, they were less  
137 differentiated organs, and callus was observed on explants accompanying with the shoot clumps  
138 formation (Fig. 2d). (2) This kind of shoots grown out from the same position of the explants. As  
139 shown in figure 2e and 2f, about 10 shoots emerged from the node of explant, and they merged together  
140 at the base of the shoot clump, which indicated that they were arise from the callus induced from the  
141 node of the explants. To simplify these shoots were named as “AD shoots” in the following description.

142 There was another kind of shoots emerged from the explants, they were speculated originated from  
143 flower reversion, the evidence include: (1) Some floret like organs were observed accompanying with  
144 these shoots (Fig. 2g), and they were connected at the base. (2) These shoots arranged different from  
145 AX and AD shoots, they were connect at the base but didn't merged like AD shoots, and they arranged  
146 dispersedly like florets on a spikelet (Fig. 2g). (3) There are several similarities between the third kind  
147 of shoots and the normal floret of switchgrass (Fig. 2h and 2i). Switchgrass spikelet was two flowered  
148 (Fig. 2i, Martinez-Reyna & Vogel, 1998), which contain a sterile floret with only three stamens and a  
149 fertile floret with three stamens and one pistil (Supplementary Fig. S1). In the regenerated shoots, we  
150 can also recognize two associated shoots grown out (Fig. 2h). At the base of these shoots, we can find a  
151 smallish and shortened tissue (Fig. 2h) which like the pedicel in a normal floret (Fig. 2i). There were  
152 two small leaves bent inward at the base of these shoots (Fig. 2h), they were similar to glumes of a  
153 floret (Fig. 2i). And at the bottom of each shoot, we also observed a bract-like leaf (Fig. 2h) which  
154 corresponding to the lemma in a floret (Fig. 2i). Morphological characters described above inferred that  
155 this kind of shoot might arise from the florets of switchgrass immature inflorescence, and to simplify it  
156 was named as “FL shoots”.

### 157 **3.3 Histological analysis revealed FL shoots arise from flower reversion**

158 Although we can confirmed that Fl shoots arise from floret, it was difficult to say if FL shoots  
159 initiated from switchgrass flower reversion or somatic embryos from florets due to the pluripotency of  
160 plant cells. For further understanding of the origin of FL shoots, here we analyzed the histological  
161 characteristics of FL shoots.

162 Figure 3a showed longitudinal section of two concomitant FL shoots. In which the residues of floral  
163 organs like glumes, lemmas and paleae were recognizable. From figure 2h and 3a, we can found that  
164 the concomitant FL shoots were different in size. According to the floral-like leaf arrangement on FL

165 shoot and corresponding floral organs arrangement on floret showed in figure 2i, it was recognized that  
166 the stouter FL shoot was initiated from the second floret with both stamens and pistil while the other  
167 one was initiated from the first floret with only stamens (Martinez-Reyna & Vogel, 1998). In FL shoot  
168 initiated from the fertile floret (Fig. 3a, left), the inner whorls tissues stopped develop into floral organs.  
169 The stamens degenerated and shortened stamen-like tissues retained. At the terminal of the floret, pistil  
170 was replaced by a newly-formed tissue without style or stigma. While in FL shoot initiated from the  
171 sterile floret (Fig. 3a, right), the stamens were also degenerated. And at the terminal of the floret, which  
172 was degenerated in normal florets (Supplementary Fig. S1), cells resume growth and formed a bulge, it  
173 was speculated the growing point of the regenerated shoot. No callus or somatic embryos were  
174 observed in FL shoots.

175 In figure 3b and 3c, we compared the microstructure of florets adjacent to FL shoots (Fig. 2g) and a  
176 normal floret (Fig. 2i). Result showed that florets adjacent to FL shoots displayed partial reversion. In  
177 these florets, the filaments were obviously shortened, and at the inner whorl where pistils should be  
178 grown out, two leaf-like tissue were observed. According to the development of flower organ in rice  
179 (Supplementary Fig. S2, Ikeda et al., 2004), they might developed from the carpel primordium  
180 although they were not fused together like a normal ovary (Fig. 3c). At the center of the normally  
181 developed floret, we can find an ovary with two separately growing styles at the top and an ovule in the  
182 center (Fig. 3c and 3d), yet at the center of the half reversed floret, a globoid tissue with neither style  
183 nor ovule was formed (Fig. 3b). Since it located at the inner whorl of the carpel, we speculated the  
184 globoid tissue was developed from the ovule primordium. Callus and somatic embryos were also not  
185 found in the half reversed florets.

186 To validate that histological characteristics mentioned above were unique in FL buds and half  
187 reversed florets, we further analyzed the histological structure of AX and AD shoots. In AX shoot  
188 clumps, the growing points of apical bud and axillary buds were small, they were covered by layers of  
189 young leaves (Fig. 3e). This structure was the same as shoot apical meristem in monocot plants like  
190 rice and maize. While in AD shoot clumps, the shoots arranged side by side, and the shoot apical  
191 meristems were also covered by young leaves although they were less compact than that of AX shoots  
192 (Fig. 3f). No floral-shaped tissue or organ was observed in both AX and AD shoots.

193 Combine results mentioned above we can conclude that FL shoots arise from floret primordium, and  
194 they were initiated from growth pattern change of the floret primordium, which means they were  
195 developed from flower reversion rather than somatic embryo.

### 196 **3.4 Factors influencing switchgrass flower reversion**

197 Flowering is a complex phenomenon regulated by multiple factors, of which photoperiod,  
198 temperature, and growth regulators have been widely investigated and showed common effects in most  
199 plant species. In this study, the living condition of reverse developed young inflorescences changed in  
200 several aspects compared with the normal ones developed outdoor. To explore the importance of each  
201 factor, we further analyzed their effect on flower reversion independently.

#### 202 *High concentration of BAP facilitated switchgrass flower reversion*

203 To explore the effect of BAP on switchgrass flower reversion induction, we analyzed the number of  
204 three kind of shoots under different concentration of BAP. Results showed that the number of AX shoot  
205 increased significantly when the level of BAP was increased from 0 to 3 mg.L<sup>-1</sup>, while it changed little  
206 when the BAP concentration increased from 3 to 5 mg.L<sup>-1</sup>. No AD shoot was induced when the BAP  
207 concentration was lower than 1 mg.L<sup>-1</sup>, however the number of AD shoot increased observably at  
208 higher BAP concentrations ( $\geq 2$  mg.L<sup>-1</sup>) and it reached a maximum at 4 mg.L<sup>-1</sup> (Fig. 4a). FL shoot was

209 not induced when the BAP concentration was lower than 1 mg.L<sup>-1</sup>. When the BAP level increased to 2  
210 mg.L<sup>-1</sup>, a small number of FL shoots started to emerge. When it increased to 3 mg.L<sup>-1</sup>, the number of  
211 FL shoots increased significantly, the average number reach to 8.9 shoots per explant, and it changed  
212 little at higher BAP concentrations (4 and 5 mg.L<sup>-1</sup>).

213 *The photoperiod have little effect on switchgrass flower reversion*

214 The day length used in this study was elongated to 20 hours compared with the filed condition (14  
215 hours). To explore if the photoperiod played an important role in switchgrass flower reversion, we  
216 analyzed the induction of three kind of shoots under a set of day time from 10 hours to 20 hours.  
217 Results showed that the number of AX, AD and FL shoots changed a little under different photoperiods  
218 (Fig. 4b), which suggesting that the day length was less important in switchgrass flower reversion.

219 *In vitro culture is required for switchgrass flower reversion*

220 The living condition of explants in switchgrass flower reversion induction was different compared  
221 with the plants in filed condition. To explore if the *in vitro* environment was essential for switchgrass  
222 flower reversion, we analyzed the effect of BAP on switchgrass inflorescence development in filed  
223 condition. As shown in figure 4c, the development of switchgrass inflorescence was not effected by  
224 exogenously supplied BAP, and no flower reversion event was observed on switchgrass inflorescences  
225 under different BAP concentrations. Which suggesting that the *in vitro* environment was crucial for  
226 switchgrass flower reversion induction.

227

## 228 **4 Discussion**

229 Flower reversion is an abnormal development of floral organs, it was affected by various  
230 physiological and hormonal factors. In this study, we achieved flower reversion in switchgrass by  
231 incubating young inflorescences on shoot induction medium. Anatomical and histological study  
232 showed that shoots emerged from the explants originated in three ways: axillary buds, adventitious  
233 buds and floral buds. And shoots came from floral buds arise from the reverse development of flower  
234 primordia.

235 Flowering is a complex phenomenon regulated by multiple factors, of which photoperiod,  
236 temperature, and growth regulators have been widely investigated and showed common effects in most  
237 plant species. Over the past decades, many studies have been carried out to reveal the underlying  
238 mechanisms of flower initiation and floral organ determination (Kramer & Hall, 2005; Li et al., 2003;  
239 Purugganan et al., 1995), both environmental factors (e.g., photoperiod and temperature) and internal  
240 factors (e.g., cytokinin, auxin and jasmonic acid) have been demonstrated affect flower formation. In  
241 this study, explants incubated on MS medium without BAP or with low concentration or BAP could not  
242 generate flower reversion, which suggested that the BAP is a key factor promoting flower reversion.  
243 Whereas, it was reported that 50 μM BAP promote flowering in Arabidopsis (D'Aloia et al., 2011), this  
244 is probably because they used a transient treatment of 8 hours while a sustained treatment was used in  
245 this study. The number of three kinds of shoots were not influenced by the photoperiod, which  
246 indicated the photoperiod was not crucial in switchgrass flower reversion despite its important role in  
247 flower initiation (Esbroeck et al., 2003; Schwartz & Amasino, 2013). Moreover, the young  
248 inflorescences in plants were not reverse developed even if high concentration of BAP was  
249 supplemented, which indicated that the BAP was not sufficient for switchgrass flower reversion, and  
250 the rich organic inorganic and matters in the *in vitro* culture were also necessary factors in switchgrass  
251 flower reversion induction.

252 The panicles of switchgrass developed basipetally, which means florets near the bottom of the

253 inflorescence are younger than those at the top (Martinez-Reyna & Vogel, 1998). In this study, we  
254 found that the recognized floral reversion mostly take place at the base of the immature inflorescence,  
255 which indicated that florets at early developmental stages were easier to reverse than those at a late  
256 stage. Moreover, in the half-reversed florets adjacent to FL shoots, it was found that the pistil showed  
257 reverse development while the stamen developed straightly, as it was well known that the formation of  
258 pistils occurs later than stamens and petals (Zik & Irish, 2003), we can deduced that floral reversion  
259 originated from the youngest tissues in a floret.

260 Floral reversion is an interesting phenomenon in plant development. However, most of the previous  
261 research concerning flower reversion focused on physiological factors influencing flower development,  
262 while few molecular biology investigations were conducted. The most likely limitation is the instability  
263 of *in vivo* induction of flower reversion described in previous reports (Battey & Lyndon, 1990;  
264 McCullough et al., 2010; Tooke et al., 2005). The *in vitro* induction of switchgrass flower reversion  
265 provide us a relatively stable protocol, and might contribute to reveal the underlying mechanisms of  
266 flower reversion and the maintenance of floral organs.

267

#### 268 **Acknowledgments:**

269 The authors would like to thank Mr. Bu Bin for the guidance in paraffin sectioning and Dr. Quan Li for  
270 editing this manuscript. This work was supported by the National Natural Science Foundation of China  
271 (31171607), National Natural Science Foundation Committee.

272

#### 273 **Compliance with ethical standards**

274 **Conflict of interest** The authors declare no conflict of interest

275

276 **REFERENCES**

- 277 Avwioro, G. (2011) Histochemical Uses of Haematoxylin - A Review. *Journal of Physics and*  
278 *Chemistry of Solids, 1*, 24-34.
- 279 Battey, N.H. & Lyndon, R.F. (1990) Reversion of flowering. *Botanical Review, 56*, 162-189  
280 doi:10.1007/BF02858534
- 281 Burris, J.N., Mann, D.G., Joyce, B.L. & Stewart, C.N. (2009) An improved tissue culture system for  
282 embryogenic callus production and plant regeneration in switchgrass (*Panicum virgatum* L.).  
283 *BioEnergy Research, 2*, 267-274 doi:10.1007/s12155-009-9048-8
- 284 Chai, G., Xu, K., Wang, Y., Sun, F., Song, L., Liu, S. & Xi, Y. (2012) Establishment of a highly  
285 efficient regeneration system of switchgrass artificial spike buds. *Acta Prataculturae Sinica, 4*,  
286 98-104
- 287 Chen S, Liu H, Chen W, Xie D & Zheng S (2009) Proteomic analysis of differentially expressed  
288 proteins in longan flowering reversion buds. *Scientia Horticulturae, 122*, 275-280  
289 doi:10.1016/j.scienta.2009.05.015
- 290 D'Aloia, M., Bonhomme, D., Bouché, F., Tamseddak, K., Ormenese, S., Torti, S., Coupland, G. &  
291 Perilleux, C. (2011) Cytokinin promotes flowering of Arabidopsis via transcriptional  
292 activation of the FT paralogue TSF. *The Plant Journal, 6*, 972-979  
293 doi:10.1111/j.1365-313X.2011.04482.x
- 294 Day, J., Loveys, B. & Aspinall, D. (1994) Environmental control of flowering of *Boronia megastigma*  
295 (Rutaceae) and *Hypocalymma angustifolium* (Myrtaceae). *Australian journal of botany, 42*,  
296 219-229 doi:10.1071/BT9940219
- 297 Esbroeck, G.A., Husseyab, M.A. & Sanderson, M.A. (2003) Variation between Alamo and  
298 Cave-in-Rock Switchgrass in Response to Photoperiod Extension. *Crop Science, 43*, 639-643
- 299 Gou, J., Tang, C., Chen, N., Wang, H., Debnath, S., Sun, L., Flanagan, A., Tang, Y., Jiang, Q., Allen,  
300 R.D. & Wang Z. (2019) SPL7 and SPL8 represent a novel flowering regulation mechanism in  
301 switchgrass. *New Phytologist, 222*, 1610-1623 doi:10.1111/nph.15712
- 302 Ikeda, K., Sunohara, H. & Nagato, Y. (2004) Developmental course of inflorescence and spikelet in  
303 rice. *Breeding Science, 54*, 147-156 doi:10.1270/jsbbs.54.147
- 304 Irish, V.F. (2010) The flowering of Arabidopsis flower development. *The Plant journal, 61*, 1014-1028  
305 doi:10.1111/j.1365-313X.2009.04065.x
- 306 Jiang, Y., Wu, C., Zhang, L., Hu, P., Hou, W., Zu, W. & Han, T. (2011) Long-day effects on the terminal  
307 inflorescence development of a photoperiod-sensitive soybean [*Glycine max* (L.) Merr.]  
308 variety. *The Plant journal, 180*, 504-510 doi:10.1016/j.plantsci.2010.11.006
- 309 Keshwani, D.R. & Cheng, J.J. (2009) Switchgrass for bioethanol and other value-added applications: A  
310 review. *Bioresource Technology, 100*, 1515-1523 doi:10.1016/j.biortech.2008.09.035
- 311 Kramer, E.M. & Hall, J.C. (2005) Evolutionary dynamics of genes controlling floral development.  
312 *Current Opinion in Plant Biology, 8*, 13-18 doi:10.1016/j.pbi.2004.09.019
- 313 Lazaro, A., Obeng-Hinne, E. & Albani, M.C. (2018) Extended Vernalization Regulates Inflorescence  
314 Fate in *Arabidopsis thaliana* by Stably Silencing PERPETUAL FLOWERING1. *Plant physiology,*  
315 *176*, 2819-2833 doi:10.1104/pp.17.01754
- 316 Li, G.S., Meng, Z., Kong, H.Z., Chen, Z.D. & Lu, A.M. (2003) ABC model and floral evolution.  
317 *Chinese Science Bulletin, 48*, 2651-2657 doi:10.1007/BF02901752
- 318 Martinez-Reyna, J.M. & Vogel, K.P. (1998) Controlled hybridization technique for switchgrass. *Crop*  
319 *Science, 38*, 876-878 doi:10.2135/cropsci1998.0011183X003800030042x



- 320 McCullough, E., Wright, K.M., Alvarez, A., Clark, CP., Rickoll, W.L. & Madlung, A. (2010)  
321 Photoperiod-dependent floral reversion in the natural allopolyploid *Arabidopsis suecica*. *New*  
322 *Phytologist*, 186, 239-250 doi:10.1111/j.1469-8137.2009.03141.x
- 323 Moncur, M. (1992) Effect of low temperature on floral induction of *Eucalyptus lansdowneana* F. Muell.  
324 & J. Brown subsp. *Lansdowneana*. *Australian Journal of Botany*, 40, 157-167  
325 doi:10.1071/BT9920157
- 326 Moore, K.J., Moser, L.E., Vogel, K.P., Waller, S.S., Johnson, B.E. & Pedersen, J.F. (1991) Describing  
327 and quantifying growth stages of perennial forage grasses. *Agronomy Journal*, 83, 1073-1077  
328 doi:10.2135/cropsci1995.0011183X003500010007x
- 329 Murashige, T. & Skoog, F. (1962) A revised medium for rapid growth and bio assays with tobacco  
330 tissue cultures. *Physiologia plantarum*, 15, 473-497 doi:10.1111/j.1399-3054.1962.tb08052.x
- 331 Nanda, K.K., Krishnamoorthy, H.N. & Anuradha, T.A. (1967) Floral induction by gibberellic acid in  
332 *Impatiens balsamina*, a qualitative short-day plant. *Planta*, 76, 367-370  
333 doi:10.1007/BF00387542
- 334 Parrish, D.J., Casler, M.D. & Monti, A. (2012) The evolution of switchgrass as an energy crop. In:  
335 Monti A (ed) Switchgrass, A Valuable Biomass Crop for Energy. Green Energy and  
336 Technology. Springer-Verlag, London, pp 1-28. doi:10.1007/978-1-4471-2903-5\_1
- 337 Parrish, D.J. & Fike, J.H. (2005) The biology and agronomy of switchgrass for biofuels. *Critical*  
338 *Reviews in Plant Sciences*, 24, 423-459 doi:10.1080/07352680500316433
- 339 Purugganan MD, Rounsley SD, Schmidt RJ & Yanofsky MF (1995) Molecular evolution of flower  
340 development: diversification of the plant MADS-box regulatory gene family. *Genetics*, 140,  
341 345-356
- 342 Sanderson, M.A., Adler, P.R., Boateng, A.A., Casler, M.D. & Sarath, G. (2006) Switchgrass as a  
343 biofuels feedstock in the USA. *Canadian Journal of Plant Science*, 86, 1315-1325  
344 doi:10.4141/P06-136
- 345 Schwartz, C. & Amasino, R. (2013) Nitrogen recycling and flowering time in perennial bioenergy  
346 crops. *Frontiers in Plant Science*, 4, 76 doi:10.3389/fpls.2013.00076
- 347 Scutt, C.P. & Vandenbussche, M. (2014) Current trends and future directions in flower development  
348 research. *Annals of Botany*, 114, 1399-1406 doi:10.1093/aob/mcu224
- 349 Tooke, F., Ordidge, M., Chiurugwi, T. & Battey, N. (2005) Mechanisms and function of flower and  
350 inflorescence reversion. *Journal of Experimental Botany*, 56, 2587-2599 doi:  
351 10.1093/jxb/eri254
- 352 Wan, Y., Ma, H., Zhao, Z., Li, T., Liu, X., Liu, X. & Li, Z. (2018) Flowering response and anatomical  
353 study on process of flower bud differentiation for *Luculia gratissima* 'Xiangfei' under  
354 different photoperiods. *Xibei Zhiwu Xuebao*, 38, 1659-1666
- 355 Wang, Y. (2001) Reversion of floral development under adverse ecological conditions in *Whytockia*  
356 *bijieensis* (Gesneriaceae). *Australian Journal of Botany*, 49, 253-258 doi:10.1071/bt00002
- 357 Wang, K., Tang, D., Hong, L., Xu, W., Huang, J., Li, M., Gu, M., Xue, Y., Cheng, Z. (2010) DEP and  
358 AFO Regulate Reproductive Habit in Rice. *PLoS Genetics*, 6, e1000818  
359 doi:10.1371/journal.pgen.1000818
- 360 Washburn, C.F. & Thomas, J.F. (2000) Reversion of flowering in *Glycine Max* (Fabaceae). *American*  
361 *Journal of Botany*, 87, 1425-1438 doi:10.2307/2656869
- 362 Winiarczyk, K., Marciniak, R. & Tchorzewska, D. (2018) Phenomenon of Floral Reversion In Bolting  
363 Garlic (*Allium sativum* L.). *Acta Scientiarum Polonorum-Hortorum Cultus*, 17, 123-134

- 364 doi:10.24326/asphc.2018.2.11
- 365 Xi, Y., Fu, C., Ge, Y., Nandakumar, R., Hisano, H., Bouton, J. & Wang, Z. (2009)
- 366 Agrobacterium-Mediated Transformation of Switchgrass and Inheritance of the Transgenes.
- 367 *BioEnergy Research*, 2, 275-283 doi:10.1007/s12155-009-9049-7
- 368 Yang, H. (1986) The use of a whole stain-clearing technique for observations on embryo sac, embryo,
- 369 endosperm and embryoid. *Acta Botanica Sinica*, 28, 002
- 370 Zhao, K., Fan, H., Jiang, X., Zhou, S. (2002) Critical day-length and photoinductive cycles for the
- 371 induction of flowering in halophyte Suaeda salsa. *The Plant Science*, 162, 27-31
- 372 doi:10.1016/S0168-9452(01)00520-9
- 373 Zik, M. & Irish, V.F. (2003) Flower development: initiation, differentiation, and diversification. *Annual*
- 374 *Review of Cell and Developmental Biology*, 19, 119-140
- 375 doi:10.1146/annurev.cellbio.19.111301.134635
- 376

377 **Figure Captions**

378 **Fig. 1** Induction of flower reversion in switchgrass at different stages. (a) Tiller at elongation stage 4;  
379 (b) Shoot apex excised from tiller; (c) Longitudinal section of shoot apex; (d) Shoot clumps emerged  
380 from explants after 30 day of incubation; (e) Shoot clumps emerged from explants after 60 day of  
381 incubation

382 **Fig. 2** Morphology features of shoots from switchgrass shoot apices. (a) Axillary bud on explants; (b)  
383 Shoots emerged from axillary buds; (c) Longitudinal section of shoots emerged from axillary buds; (d)  
384 Callus emerged from nodes; (e) Shoots emerged from adventitious buds; (f) Longitudinal section of  
385 shoots emerged from adventitious buds; (g) Shoots emerged from flower buds; (h) Shoots separated  
386 from shoot clump emerged from flower buds; (i) A normal floret of switchgrass. Bars = 2 mm

387 Cl: callus; fo: floret; pd: pedicel; pdl: pedicel-like; gu: glume; gul: glume-like; le: lemma; lel:  
388 lemma-like

389 **Fig. 3** Histological features of shoots from switchgrass shoot apices. (a) Longitudinal section of shoots  
390 emerged from flower buds; (b) Longitudinal section of half- reversed floret; (c) Longitudinal section of  
391 un- reversed floret; (d) A normal pistil of switchgrass; (e) Longitudinal section of shoots emerged from  
392 axillary buds; (f) Longitudinal section of shoots emerged from adventitious buds. In d and e, bar =  
393 400µm, in other parts, bar = 100µm

394 Ca: carpel; cal: carpel-like; gul: glume-like; pal: palea-like; lel: lemma-like; sml: stamen-like; pil:  
395 pistil-like; sm: stamen; ov: ovule; ovl: ovary-like; st: style; fi: filament; oy: ovary

396 **Fig. 4** Analysis of factors influencing switchgrass flower reversion. (a) The effect of BAP on shoot  
397 number of three kinds of shoots; (b) The effect of day length on shoot number of three kinds of shoots;  
398 (c) The effect of BAP on switchgrass inflorescence development in plant

399

400

Table 1 Plant flower reversion and reversion feature in recently publications

| Species                    | Flowering conditions               | Reversion conditions                                    | Characteristics of reverted plants                                                                                                                                                                                 | Reference                 |
|----------------------------|------------------------------------|---------------------------------------------------------|--------------------------------------------------------------------------------------------------------------------------------------------------------------------------------------------------------------------|---------------------------|
| <i>Dimocarpus longan</i>   | Low temperature in winter          | Warm temperature and high humidity                      | The inflorescence stopped reproductive growth and developed leaves, some of the inflorescence converted to vegetative shoots                                                                                       | (Chen et al., 2009)       |
| <i>Arabidopsis suecica</i> | Long-day                           | Short-day                                               | Flowers of this allotetraploid partially reversed in long days, and the frequency is greatly increased under short day condition                                                                                   | (McCullough et al., 2010) |
| <i>Oryza sativa</i>        | Short-day                          | double mutation of <i>dep</i> and <i>afo</i>            | In the double mutant of <i>dep</i> and <i>afo</i> , florets finally developed into shoots                                                                                                                          | (Wang et al., 2010)       |
| <i>Glycine max</i>         | Short-day                          | Long-day                                                | By transfer plants grown in short days condition to long days condition for 2-5 weeks, and then back into short days, the flowering time was delayed and vegetative growth was found in florets and inflorescences | (Jiang et al., 2011)      |
| <i>Arabis alpina</i>       | Vernalization                      | Insufficient vernalization                              | Insufficient vernalization leads to the reverse development of flower primordia into new branches                                                                                                                  | (Lazaro et al., 2018)     |
| <i>Allium sativum</i>      | Not flower under natural condition | Reverse under natural condition                         | The inflorescence developed bulblet under natural condition                                                                                                                                                        | (Winiarczyk et al., 2018) |
| <i>Luculia gratissima</i>  | Short-day                          | Long-day                                                | By transfer plants grown in short days condition for 2-25days to continuous long days, the flower buds form vegetative buds, the bracts and sepals turned to be leaf-like                                          | (Wan Y et al., 2018)      |
| <i>Panicum virgatum</i>    | Short-day                          | Down-regulate expression of <i>SPL7</i> and <i>SPL8</i> | Down-regulate any one of <i>SPL7</i> and <i>SPL8</i> result in flowering time delay, while down-regulate both lead to flower reversion                                                                             | (Gou et al., 2019)        |

401

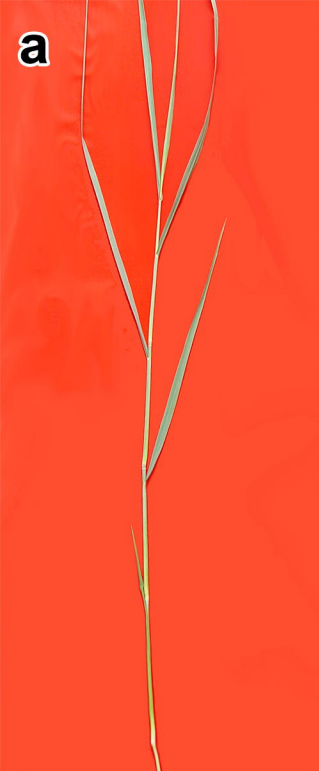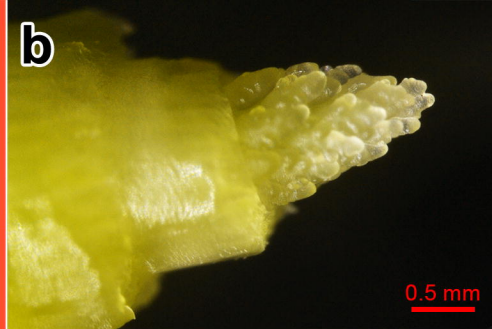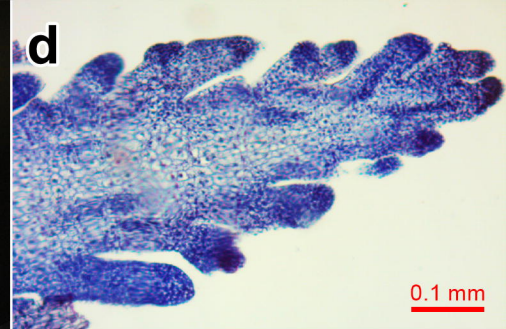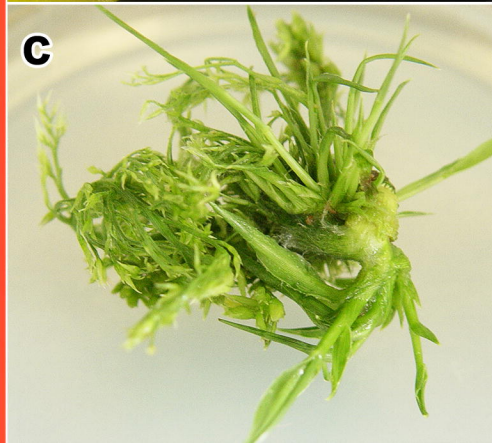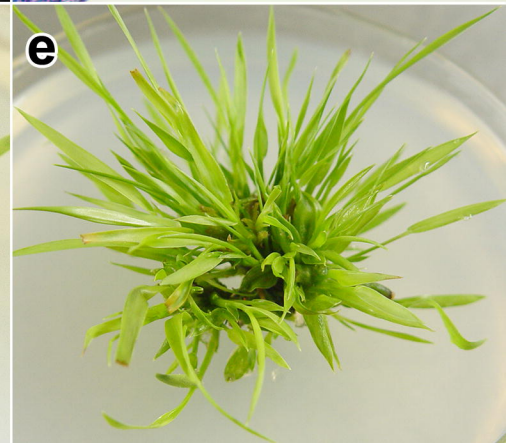

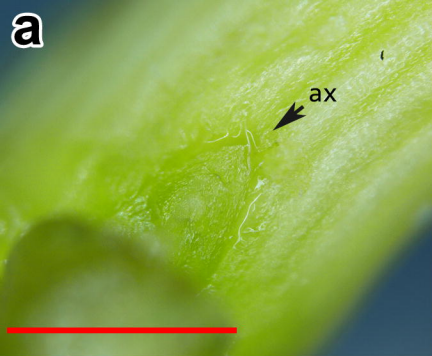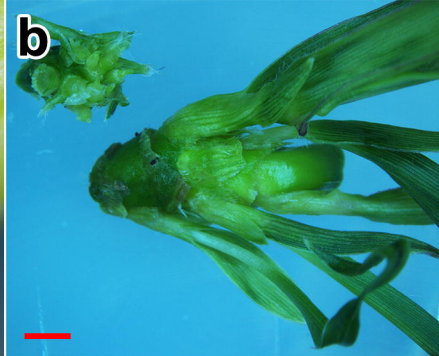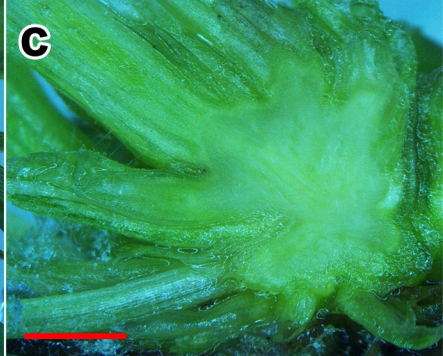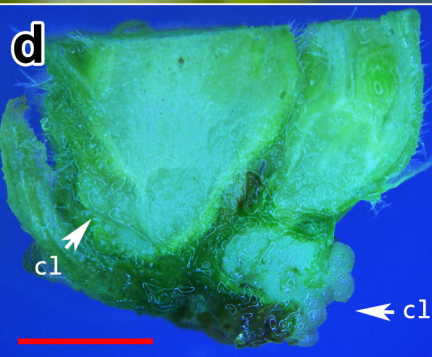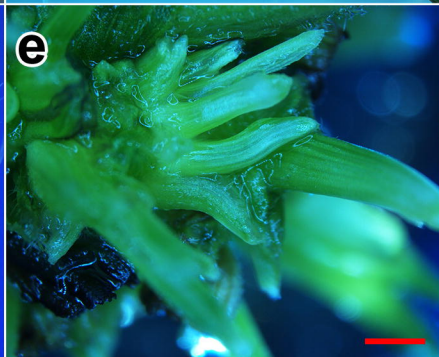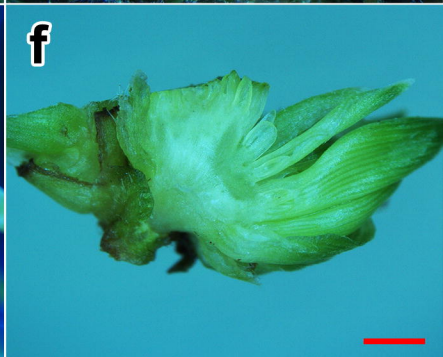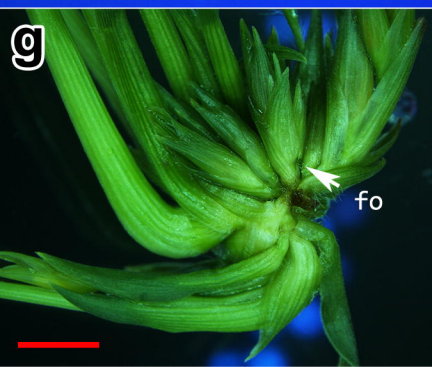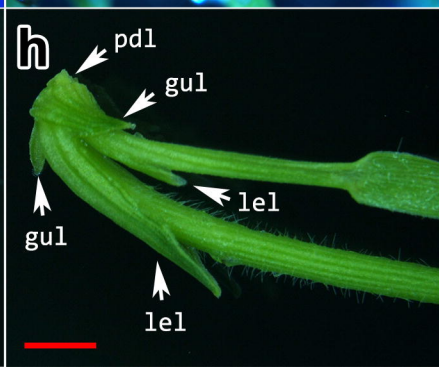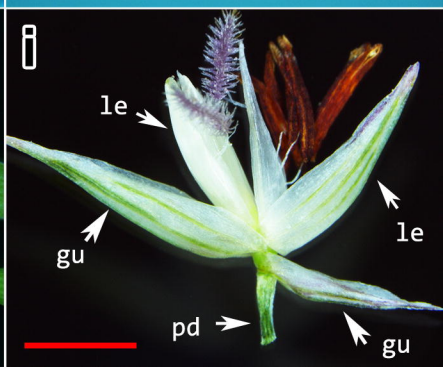

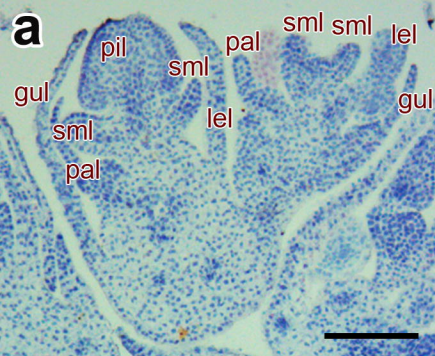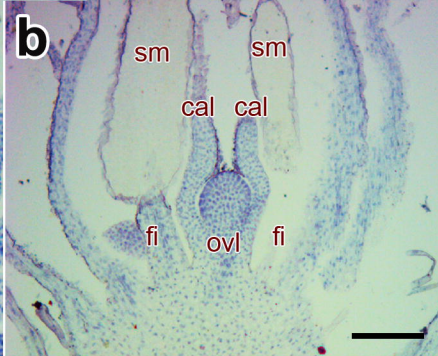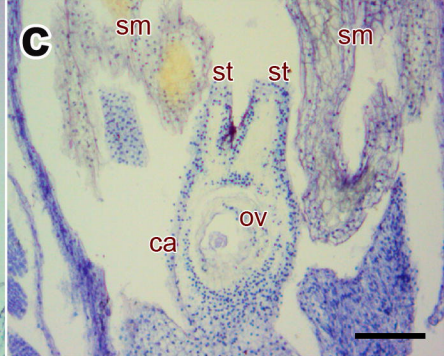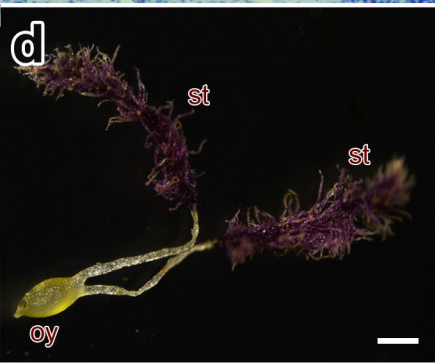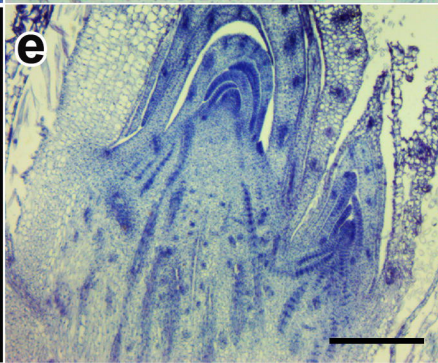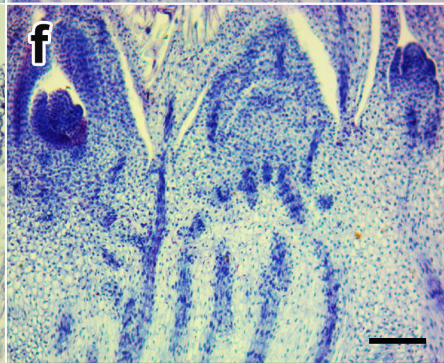

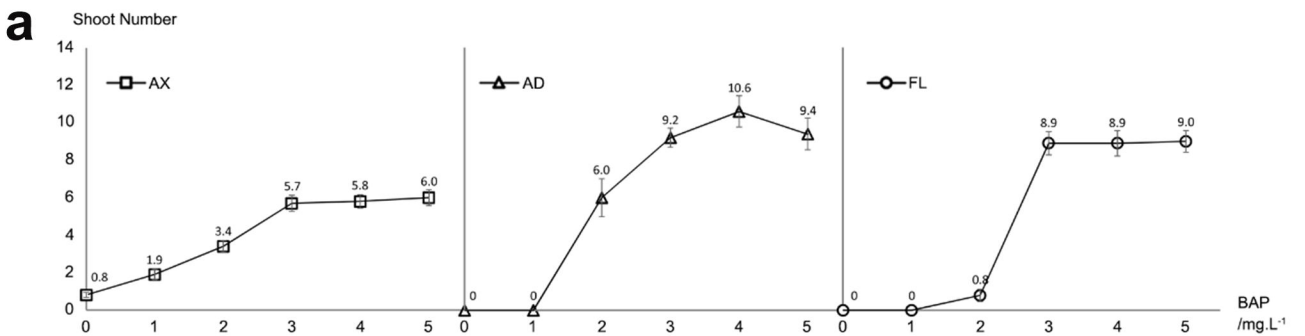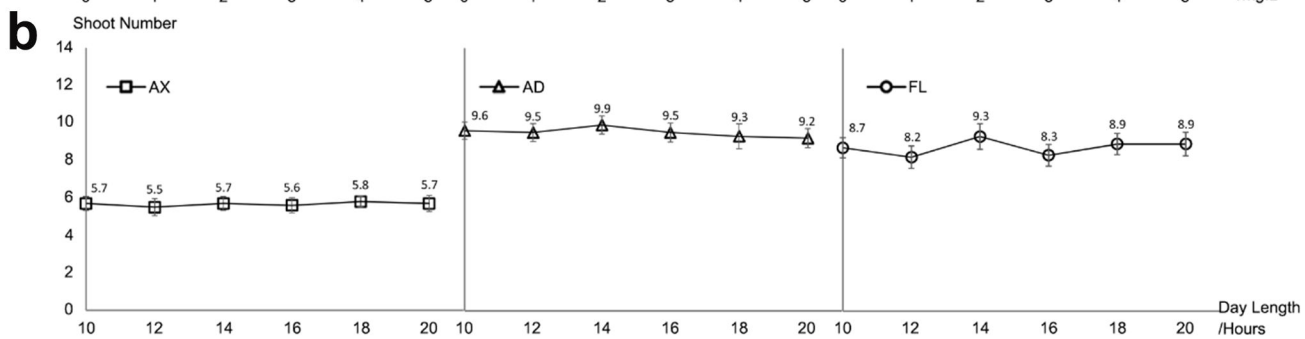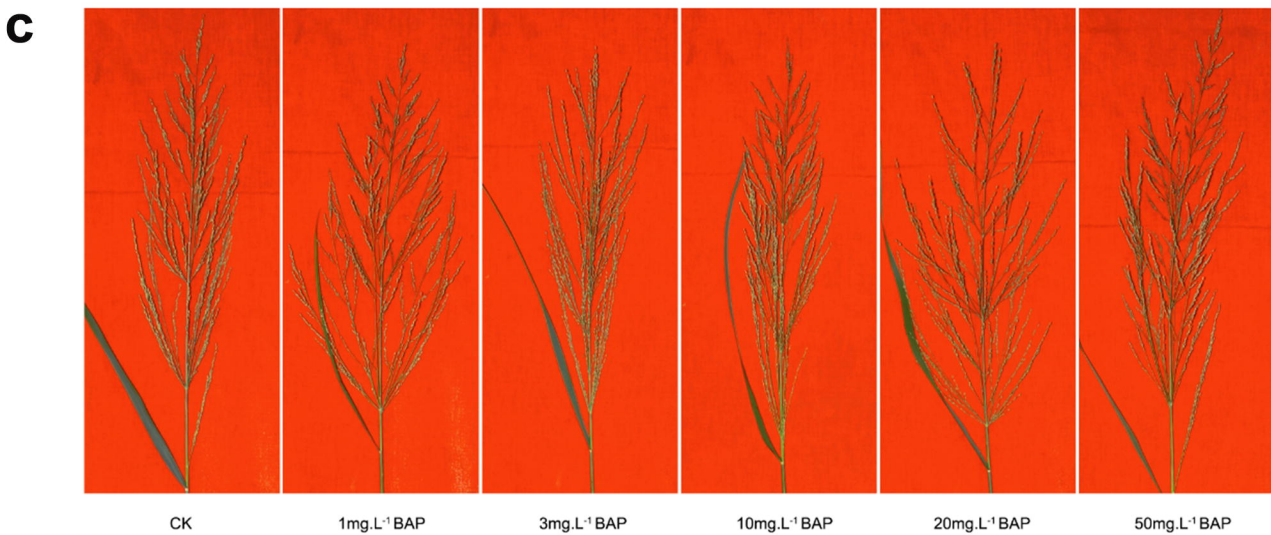



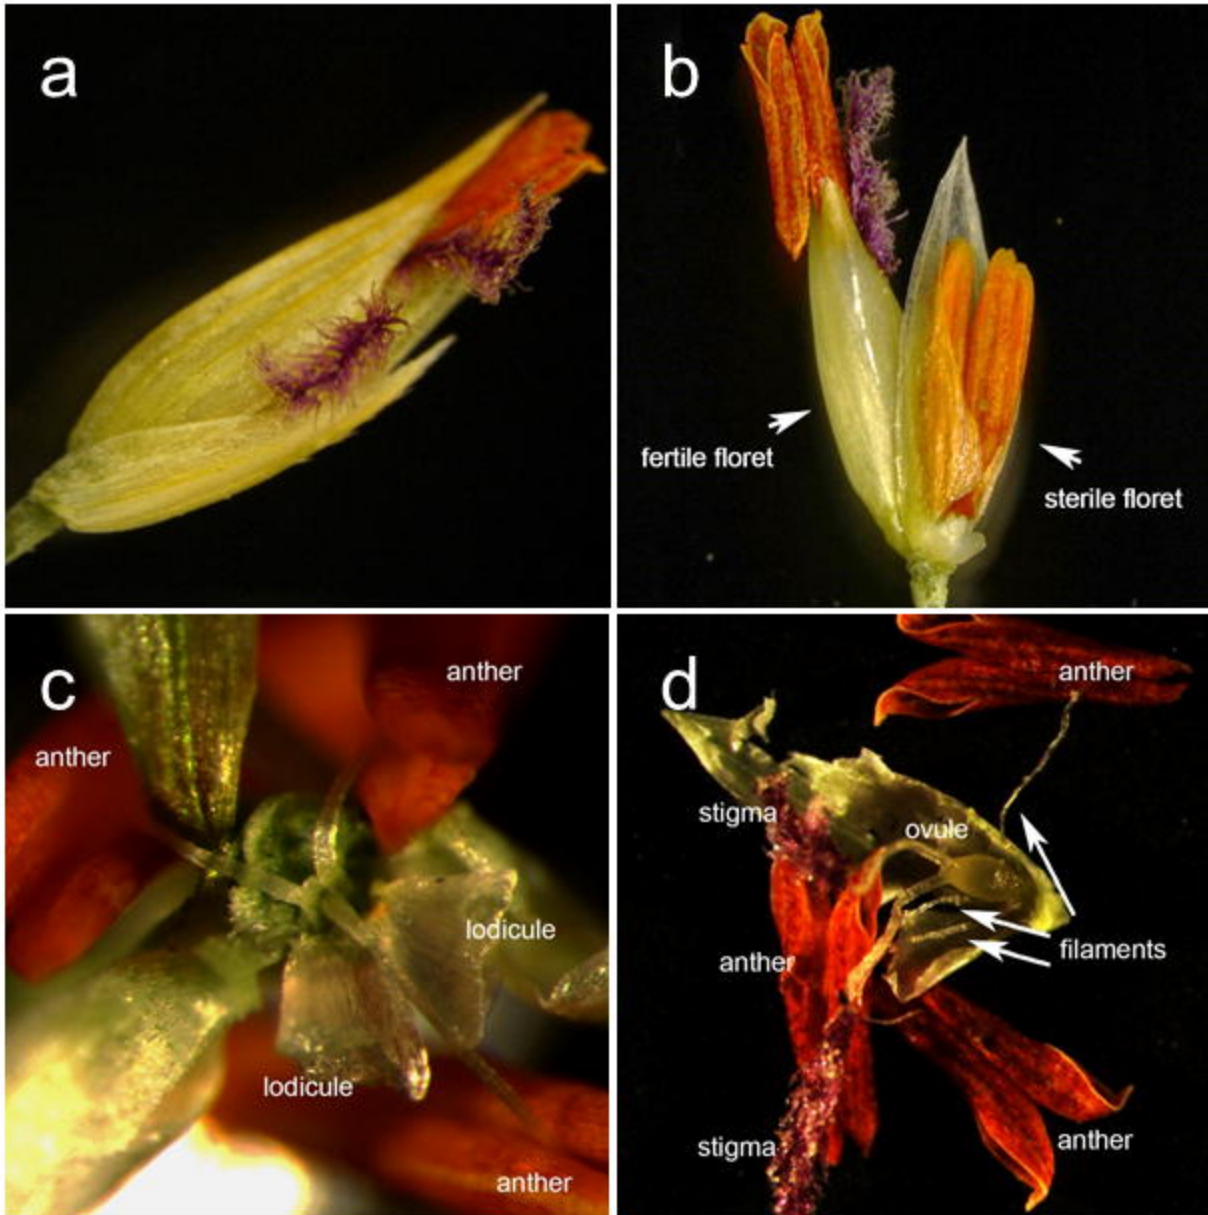

**Figure S1**  
**Switchgrass flower.**  
 (a). Overview of a switchgrass flower.  
 (b). The fertile floret and sterile floret in switchgrass flower.  
 (c). The Vertical view of sterile floret.  
 (d). The side view of fertile floret.

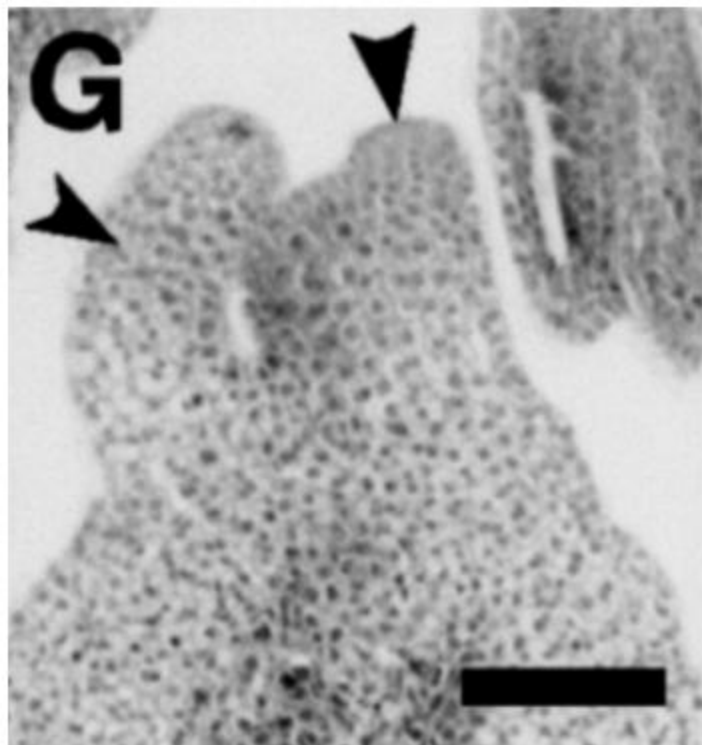

**Figure S2 (G) Carpel primordium (arrowhead) formation of rice.**

A. Ikeda, K., Sunohara, H., and Nagato, Y. (2004). Developmental course of inflorescence and spikelet in rice. *Breeding Sci* 54(2), 147-156. doi: DOI 10.1270/jsbbs.54.147.
